# Supplementary material for: Aldehyde dehydrogenase 2 inhibits inflammatory response and regulates atherosclerotic plaque
Source: PubMed Central journal article supplement (PMC5094945; doi:10.18632/oncotarget.9384), 2016-05-15
Supplement: oncotarget-07-35562-s001.pdf [file oncotarget-07-35562-s001.pdf]

# Aldehyde dehydrogenase 2 inhibits inflammatory response and regulates atherosclerotic plaque

## Supplementary Material

This file includes:

**Supplementary Figure S1:** LPS induced MCP-1 and ICAM-1 expression in HUVECs.

**Supplementary Figure S2:** The effects of Daidzin and Alda-1 on ALDH2 activity.

**Supplementary Table S1:** Body weight in three groups of mice.

**Supplementary Table S2:** Serum lipid levels in ApoE<sup>-/-</sup> mice.

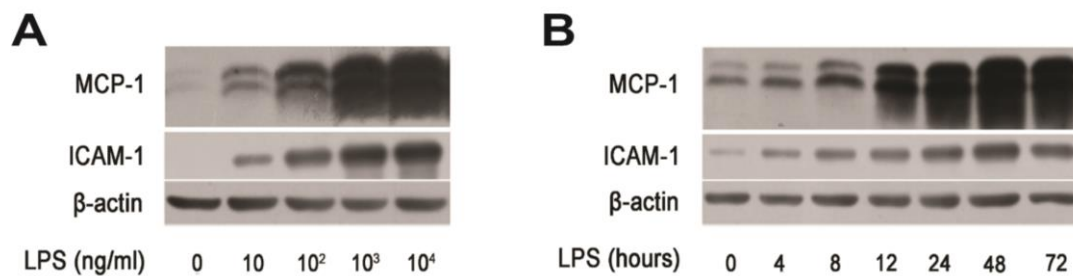

**Supplementary Figure S1.** LPS induced MCP-1 and ICAM-1 expression in HUVECs.

Western blot analysis for LPS-induced concentration-dependent (**A**) and time-dependent (**B**) MCP-1 and ICAM-1 expression changes in HUVECs.

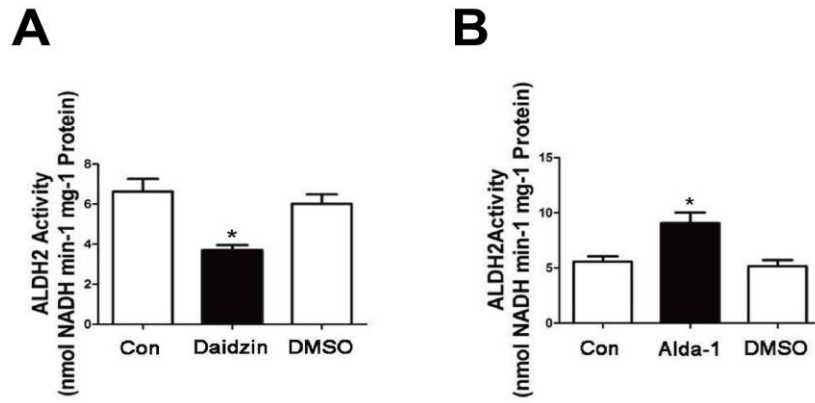

**Supplementary Figure S2:** The effects of Daidzin and Alda-1 on ALDH2 activity.

Histograms of effects of 25µM Daidzin (**A**) and 20µM Alda-1 (**B**) on ALDH2 activity in HUVECs. Values are expressed as means±SEM from three independent experiments. \*: P<0.05 vs control.

**Supplementary Table S1:** Body weight in three groups of mice.

|                 | Baseline<br>(n=60) | End of 8th<br>weeks<br>(n=60) | End of 12 weeks (n=58)    |                                                |                                      |
|-----------------|--------------------|-------------------------------|---------------------------|------------------------------------------------|--------------------------------------|
|                 |                    |                               | Lv-GFP<br>group<br>(n=20) | Lv-ALDH2<br>-overexpression<br>group<br>(n=19) | Lv-ALDH2<br>-RNAi<br>group<br>(n=19) |
| Body weight (g) | 20.9±0.8           | 30.1±2.0                      | 32.0±1.9                  | 31.8±2.0                                       | 31.3±1.6                             |

Data were displayed as mean±SEM.

**Supplementary Table S2:** Serum lipid levels in ApoE<sup>-/-</sup> mice.

|                               | TC         | TG        | HDL-C     | LDL-C     |
|-------------------------------|------------|-----------|-----------|-----------|
|                               | (mmol/L)   | (mmol/L)  | (mmol/L)  | (mmol/L)  |
| Lv-GFP group                  | 16.66±1.47 | 0.66±0.13 | 1.74±0.15 | 8.22±0.86 |
| Lv-ALDH2-overexpression group | 16.79±1.44 | 0.62±0.14 | 1.81±0.14 | 8.72±0.88 |
| Lv-ALDH2-RNAi group           | 15.94±1.25 | 0.70±0.14 | 1.72±0.15 | 8.80±0.80 |

ApoE<sup>-/-</sup> mice were treated with a high-fat diet (15% cocoa butter and 0.25% cholesterol), as described in the methods section. Data were showed as mean±SEM. TC: total cholesterol; TG: triglyceride
